# Supplementary material for: La evolución Premax una aproximación de sistemas
Source: Springer Nature journal article supplement (doi:10.1186/1471-2105-7-165), 2001-01-01
Supplement: Additional file 10 [file 1471-2105-7-165-s10.pdf]

**LINK Vary tg**

|        |        |        |                                                                               |
|--------|--------|--------|-------------------------------------------------------------------------------|
| tg=3.0 | tc=1.5 | R >0.5 | overlap with ChIP-on-chip data (P <= 0.005): 217/940=0.2309                   |
| tg=4.0 | tc=1.5 | R >0.5 | overlap with ChIP-on-chip data (P <= 0.005): 97/244=0.3975 (our choice of tg) |
| tg=5.0 | tc=1.5 | R >0.5 | overlap with ChIP-on-chip data (P <= 0.005): 34/82=0.4146                     |

At tg=5.0 the overlap with ChIP-on-chip is slightly bigger than at tg=4.0.

However, the number of predictions decreases by factor of three.

Our choice of tg=4.0, which is more restrictive than the one used by Ihmels et al (tg=3.0), leads to a better overlap with currently available ChIP-on-chip data

**STAR Vary tg**

|        |        |        |                                                                                |
|--------|--------|--------|--------------------------------------------------------------------------------|
| tg=3.0 | tc=1.5 | R >0.7 | overlap with ChIP-on-chip data (P <= 0.005): 234/539=0.4341                    |
| tg=4.0 | tc=1.5 | R >0.7 | overlap with ChIP-on-chip data (P <= 0.005): 190/419=0.4535 (our choice of tg) |
| tg=5.0 | tc=1.5 | R >0.7 | overlap with ChIP-on-chip data (P <= 0.005): 180/413=0.4358                    |

**LINK Vary tc**

|        |        |        |                                                                               |
|--------|--------|--------|-------------------------------------------------------------------------------|
| tg=4.0 | tc=1.0 | R >0.5 | overlap with ChIP-on-chip data (P <= 0.005): 62/159=0.3899                    |
| tg=4.0 | tc=1.5 | R >0.5 | overlap with ChIP-on-chip data (P <= 0.005): 97/244=0.3975 (our choice of tc) |
| tg=4.0 | tc=2.0 | R >0.5 | overlap with ChIP-on-chip data (P <= 0.005): 118/333=0.3544                   |

**STAR Vary tc**

|        |        |        |                                                                                |
|--------|--------|--------|--------------------------------------------------------------------------------|
| tg=4.0 | tc=1.0 | R >0.7 | overlap with ChIP-on-chip data (P <= 0.005): 154/345=0.4464                    |
| tg=4.0 | tc=1.5 | R >0.7 | overlap with ChIP-on-chip data (P <= 0.005): 190/419=0.4535 (our choice of tc) |
| tg=4.0 | tc=2.0 | R >0.7 | overlap with ChIP-on-chip data (P <= 0.005): 190/464=0.4095                    |

**LINK Vary R**

|        |        |        |                                                                              |
|--------|--------|--------|------------------------------------------------------------------------------|
| tg=4.0 | tc=1.5 | R >0.3 | overlap with ChIP-on-chip data (P <= 0.005): 161/434=0.3710                  |
| tg=4.0 | tc=1.5 | R >0.5 | overlap with ChIP-on-chip data (P <= 0.005): 97/244=0.3975 (our choice of R) |
| tg=4.0 | tc=1.5 | R >0.7 | overlap with ChIP-on-chip data (P <= 0.005): 32/84=0.3810                    |

**STAR Vary R**

|        |        |        |                                                                               |
|--------|--------|--------|-------------------------------------------------------------------------------|
| tg=4.0 | tc=1.5 | R >0.5 | overlap with ChIP-on-chip data (P <= 0.005): 261/681=0.3833                   |
| tg=4.0 | tc=1.5 | R >0.7 | overlap with ChIP-on-chip data (P <= 0.005): 190/419=0.4535 (our choice of R) |
| tg=4.0 | tc=1.5 | R >0.9 | overlap with ChIP-on-chip data (P <= 0.005): 10/25=0.4                        |

For the restrictive values we choose for tc and tg, the cutoff R has a noticeable (monotonic) effect on the number of predictions (coverage), but a smaller effect on the overlap with ChIP-on-chip data.
